# Supplementary material for: Potential biomarkers to follow the progression and treatment response of Huntington’s disease
Source: PubMed Central journal article supplement — J Exp Med. 2016 Nov 14;213(12):2655–69. doi: 10.1084/jem.20160776 (PMC5110026; doi:10.1084/jem.20160776), 2016-11-14
Supplement: JEM_20160776_sm.pdf [file JEM_20160776_sm.pdf]

SUPPLEMENTAL MATERIAL

Disatnik et al., <http://dx.doi.org/10.1084/jem.20160776>

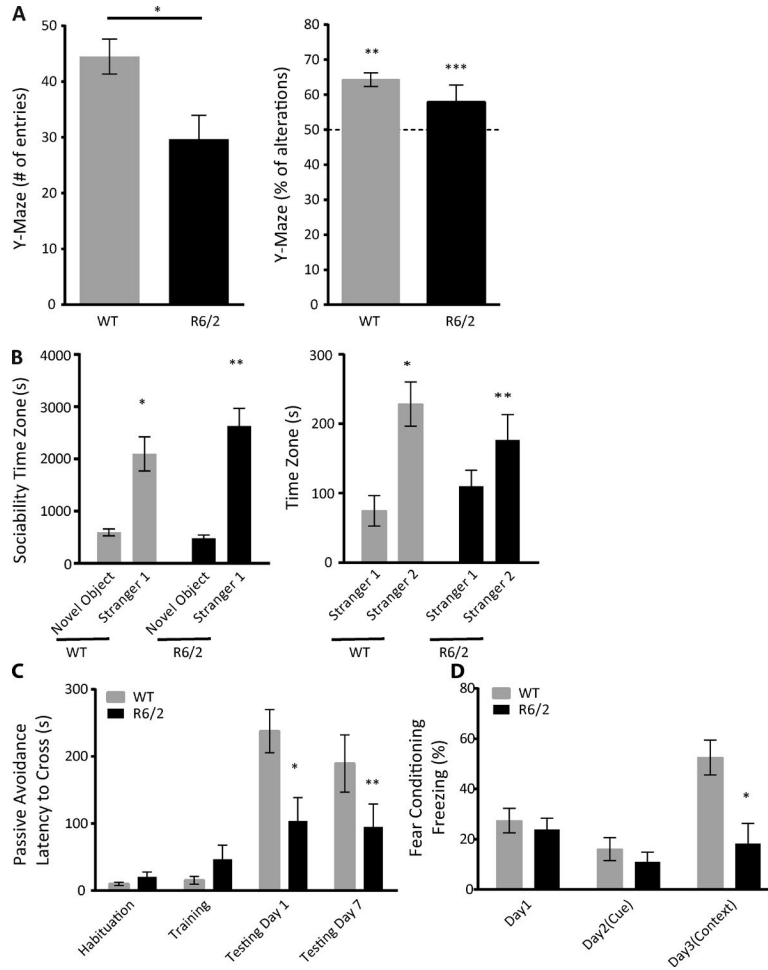

Figure S1. **Behavioral analysis of R6/2 mice at 11 wk of age.** (A) R6/2 mice have lower number of entries in the arms during the y-maze spontaneous alternation test when compared with the WT mice. Their percentage of alternation is not statistically >50% chance level, whereas the WT mice have significantly higher alternation when compared with chance level.  $n = 10$  WT and  $n = 9$  R6/2. \*,  $P = 0.016$  versus WT; \*\*,  $P = 0.0001$  vs. WT; \*\*\*,  $P = 0.1443$  versus R6/2. (B) During the sociability phase of the PhenoLab, both the WT and R6/2 mice spent a significant amount of time in the zone with stranger 1 mouse when compared with the zone with a novel object, indicating normal social behavior in both groups of mice ( $n = 10$  WT and  $n = 9$  R6/2. \*,  $P = 0.0014$  WT novel object vs. WT stranger 1; paired Student's  $t$  test. \*\*,  $P = 0.0001$  R6/2 novel object vs. R6/2 stranger 1; paired Student's  $t$  test). However, the R6/2 mice did not spend significantly more time in the stranger 2 zone as compared with the stranger 1 zone, indicating their lack of social discrimination to a novel stranger 2 mouse. WT mice spent significantly more time in the stranger 2 zone as compared with the stranger 1 zone. \*,  $P = 0.0117$  WT stranger 1 versus WT stranger 2; nonparametric paired Student's  $t$  test. \*\*,  $P = 0.01852$  R6/2 stranger 1 versus R6/2 stranger 2; paired Student's  $t$  test. (C) Both WT and R6/2 mice have comparable latency to enter the dark chamber during habituation and training day. WT mice have significantly longer latency to enter the dark chamber on day 1 after training when compared with the R6/2 mice (\*,  $P = 0.0162$  WT vs. R6/2; Mann-Whitney test). The difference in latency to enter the dark chamber was less prominent at day 7 after training.  $n = 10$  WT and  $n = 9$  R6/2. \*\*,  $P = 0.0995$  WT versus R6/2; unpaired Student's  $t$  test. (D) The WT and R6/2 mice have similar percentage of freezing during day 1 training and day 2 cued testing. The percent freezing for the WT was significantly higher during day 3 contextual testing when compared with that of the R6/2 mice.  $n = 9$  WT and  $n = 6$  R6/2. \*,  $P = 0.007$  WT versus R6/2; unpaired Student's  $t$  test. Error bars represent mean  $\pm$  SEM.

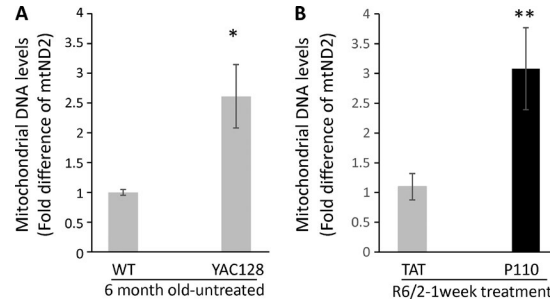

Figure S2. **mtDNA levels in plasma of YAC128 mice.** (A) Analysis of mtDNA levels (*mtND2*) in plasma of 6-mo-old untreated WT and untreated YAC128 mice.  $n = 9$  WT and  $n = 9$  YAC128. \*,  $P = 0.0115$  WT versus YAC128. (B) Beneficial effect of 1-wk P110 treatment of 13-wk-old R6/2 mice. Circulating *mtND2* levels were measured in plasma of R6/2 mice treated with P110 for 1 wk at 8 wk old before collection of the samples. The levels of *mtND2* increased in P110-treated plasma compared with untreated.  $n = 5$  R6/2 TAT and  $n = 3$  P110 R6/2. The results are presented as mean  $\pm$  SEM of  $2^{-\Delta\Delta C_T}$ . \*\*,  $P = 0.0146$  TAT versus P110.

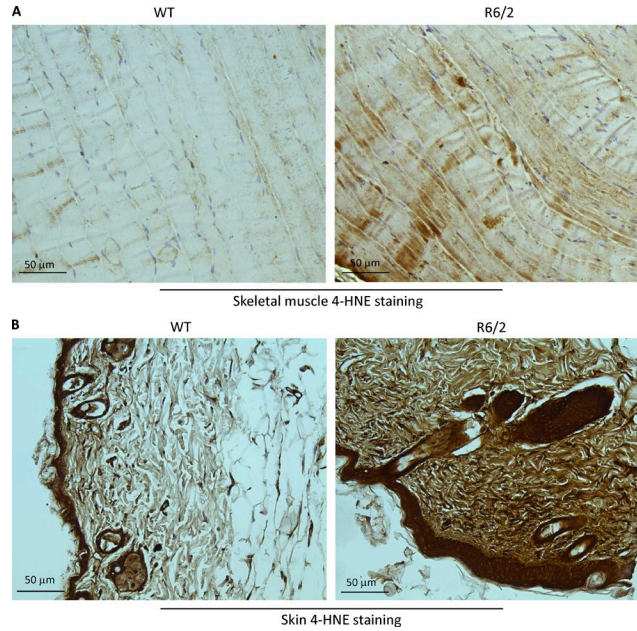

Figure S3. **4-HNE staining of skeletal muscle and skin sections of 13-wk-old mice.** (A and B) Protein adducts stained with 4-HNE were found predominantly in muscle sections (A) and in skin sections (B) of R6/2 mice relative to WT mice. A representative result of three sections of three mice/group is shown. Quantification of the respective staining is provided in Table 1.

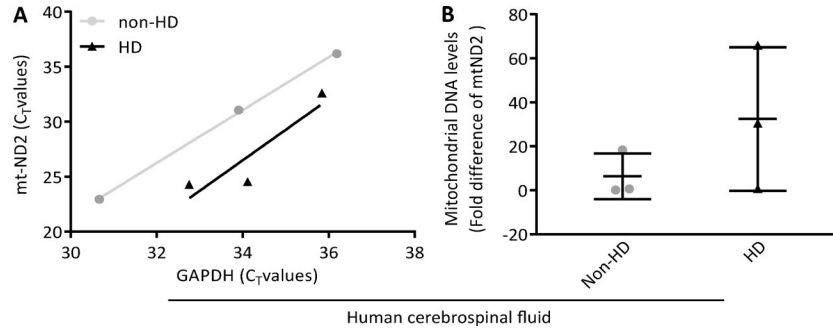

Figure S4. **mtND2 levels in human HD CSF.** (A and B) mtND2 was determined in three CSF human samples from non-HD patients (control) or from HD patients. (A) The scatter plot illustrates the C<sub>T</sub> values of nuclear DNA GAPDH (x axis) against C<sub>T</sub> values of mtDNA mtND2 (y axis) in human CSF of non-HD and HD patients CSF. R-square value = 0.9991 and 0.8277 for non-HD (control) and HD subjects, respectively. *n* = 3/group. (B) mtND2 levels (calculated as 2<sup>-ΔΔC<sub>T</sub></sup>) are shown in non-HD CSF and HD patients. The differences between the two groups were not significant because of the small number of samples. *n* = 3/group.
